# Supplementary material
Source: publisher figshare collection journal article supplement (https://acs.figshare.com/ndownloader/files/21810021)
Supplement: Supplementary file 1 [file 21810021]

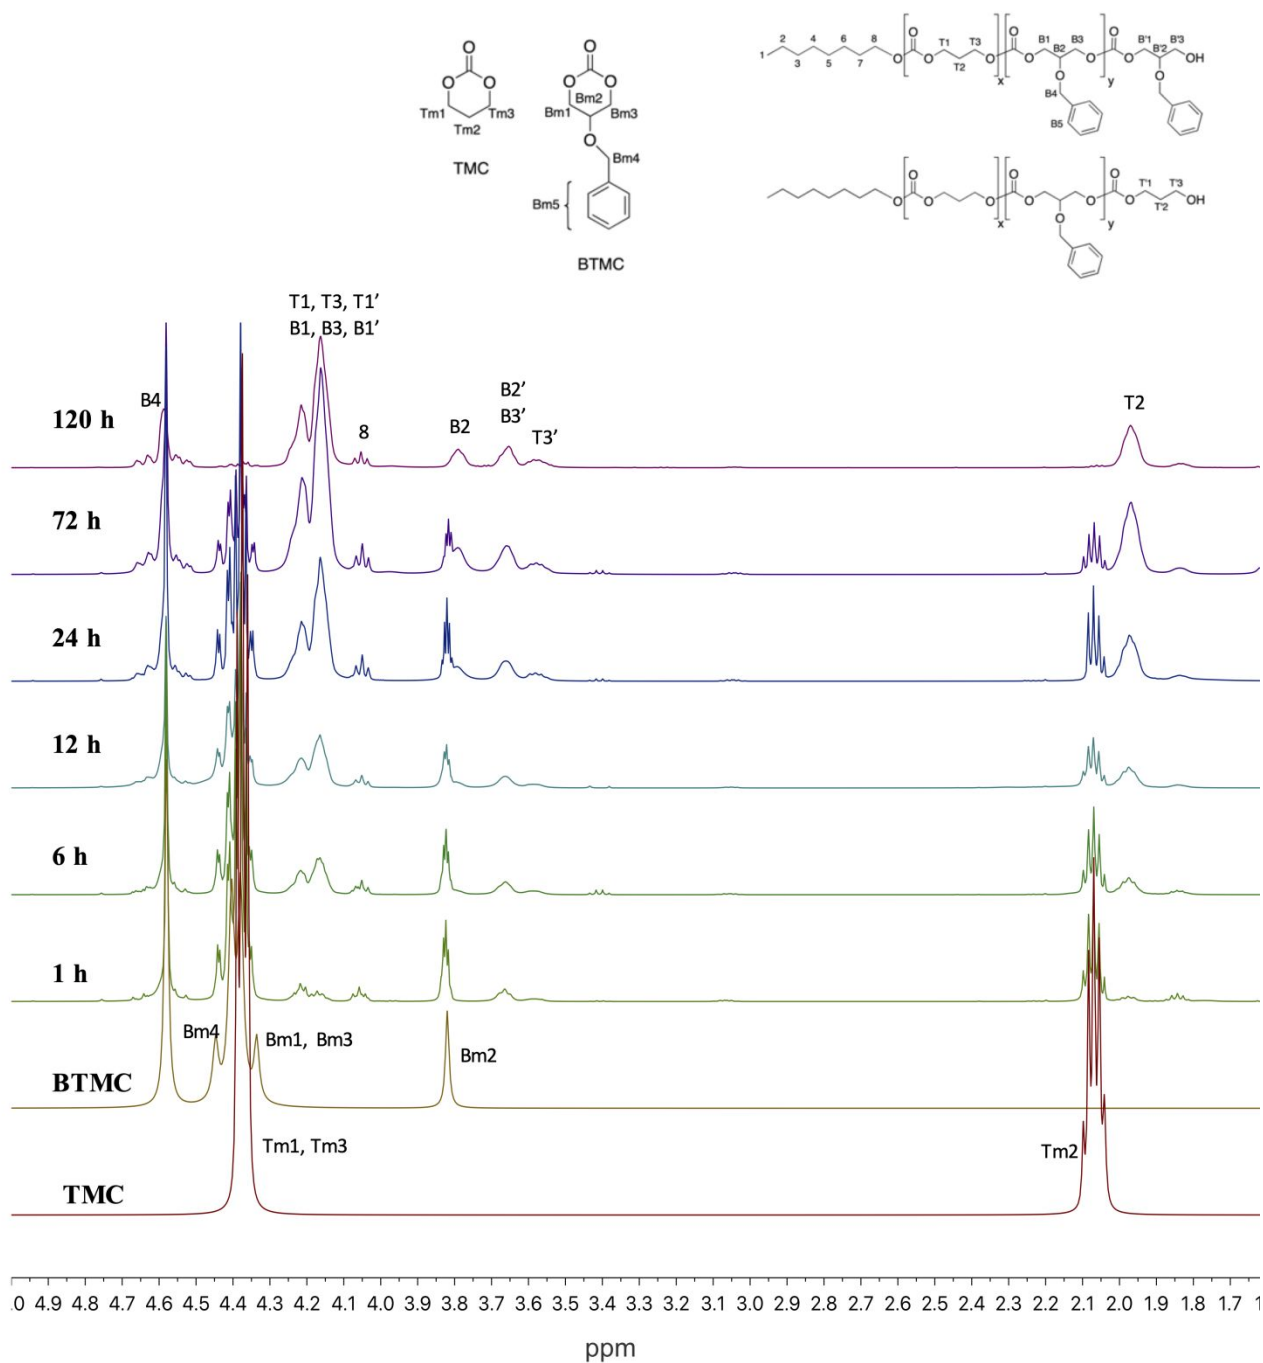

**Supplemental Figure 1.** Stacked  $^1\text{H}$  NMR spectra of TMC and BTMC conversion with time during copolymerization. The initiator was 1-octanol and the catalyst was  $\text{HCl}\cdot\text{Et}_2\text{O}$ . The spectra were obtained in  $\text{CDCl}_3$ .
